# Supplementary material for: Synthesis, characterisation and computational studies on a novel one-dimensional arrangement of Schiff-base Mn3 single-molecule magnet
Source: Royal Society of Chemistry journal article supplement (doi:10.1039/c0dt00143k), 2010-01-01
Supplement: c0dt00143k.pdf [file c0dt00143k.pdf]

## Supplementary Information

# Synthesis, Characterisation and Computational Studies on a Novel One-Dimensional Arrangement of Schiff-base $Mn_3$ Single-Molecule Magnet

Po-Heng Lin,<sup>a</sup> Serge Gorelsky,<sup>b</sup> Didier Savard,<sup>a</sup> Tara J. Burchell,<sup>a</sup> Wolfgang Wernsdorfer,<sup>c</sup> Rodolphe Clérac<sup>c,d</sup> and Muralee Murugesu<sup>a,b,\*</sup>

<sup>a</sup> Chemistry Department, University of Ottawa 401 D'Iorio Hall, 10 Marie Curie, Ottawa, Canada, K1N 6N5. Fax: (613) 562 5170; Tel: (613) 562 5800; E-mail: [mmurugesu@uottawa.ca](mailto:mmurugesu@uottawa.ca)

<sup>b</sup> Centre for Catalysis Research and Innovation, University of Ottawa, 30 Marie Curie, Ottawa, Canada, K1N 6N5.

<sup>c</sup> CNRS, UPR 8641, Centre de Recherche Paul Pascal (CRPP), Equipe "Matériaux Moléculaires Magnétiques", 115 avenue du Dr. Albert Schweitzer, Pessac, F-33600, France.

<sup>d</sup> Université de Bordeaux, UPR 8641, Pessac, F-33600, France.

<sup>e</sup> Institut Néel, CNRS & University J. Fourier, BP 166, 38042 Grenoble, Cedex 9, France.

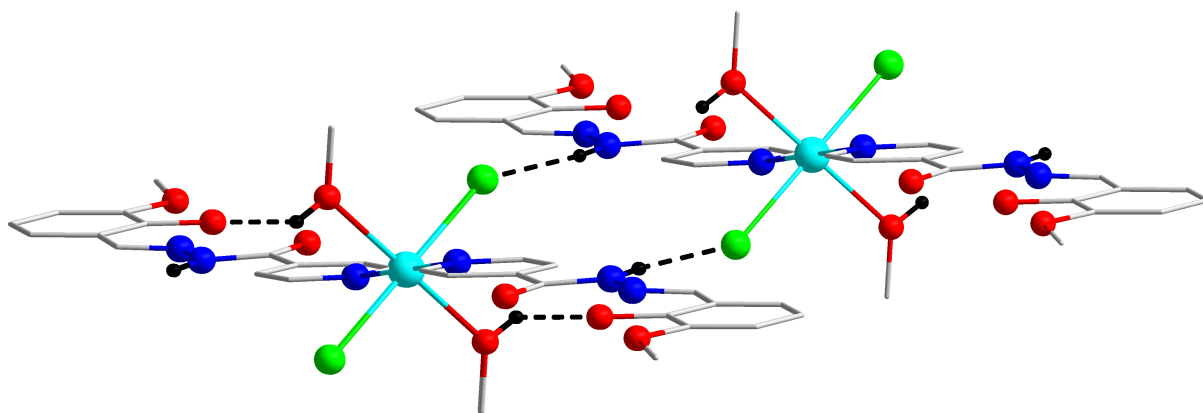

**Fig. S1** The packing arrangement of **1** viewed along the *b* axis. The black dotted lines represent the hydrogen bonds between the units. The hydrogen atoms and solvent molecules are omitted for clarity. Color code: Turquoise ( $Mn^{II}$ ), Red (O), Blue (N), Gray (C), Green (Cl).

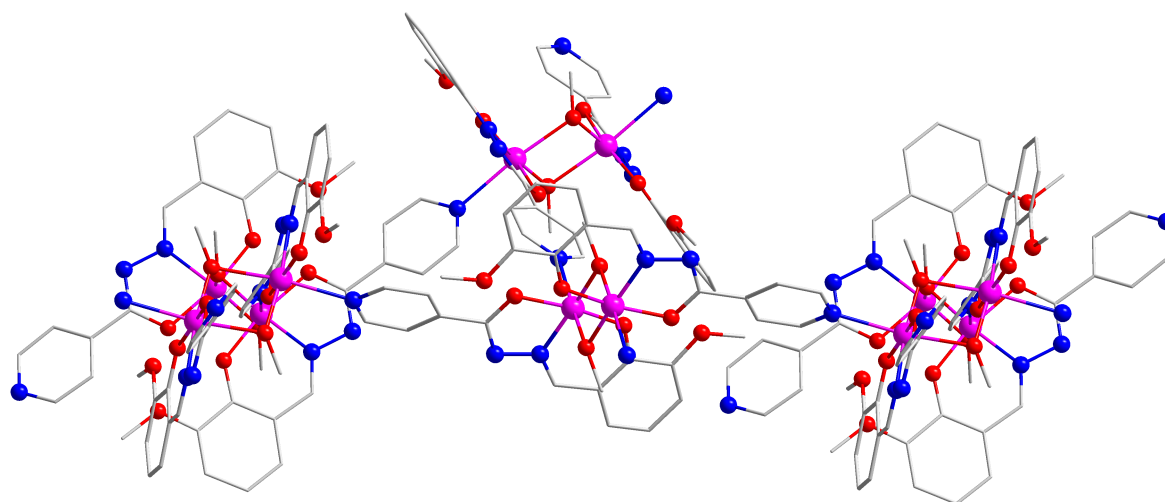

**Fig. S2** The packing arrangement of **2** viewed along the *ab* plane. The hydrogen atoms and solvent molecules are omitted for clarity. Color code: Purple ( $Mn^{III}$ ), Red (O), Blue (N), Gray (C).

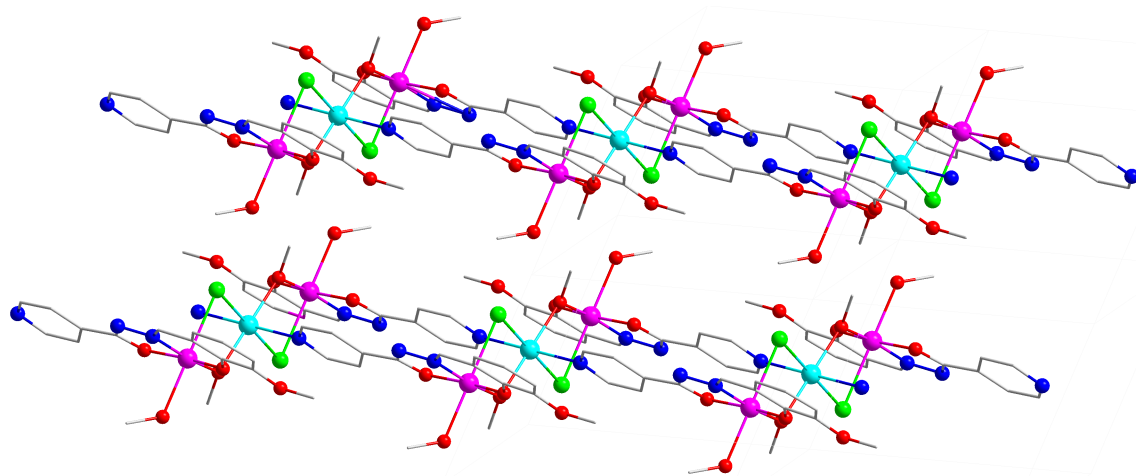

**Fig. S3** The packing arrangement of **3** viewed along the *c* axis. The hydrogen atoms and solvent molecules are omitted for clarity. Color code: Turquoise (Mn<sup>II</sup>), Purple (Mn<sup>III</sup>), Red (O), Blue (N), Gray (C), Green (Cl).

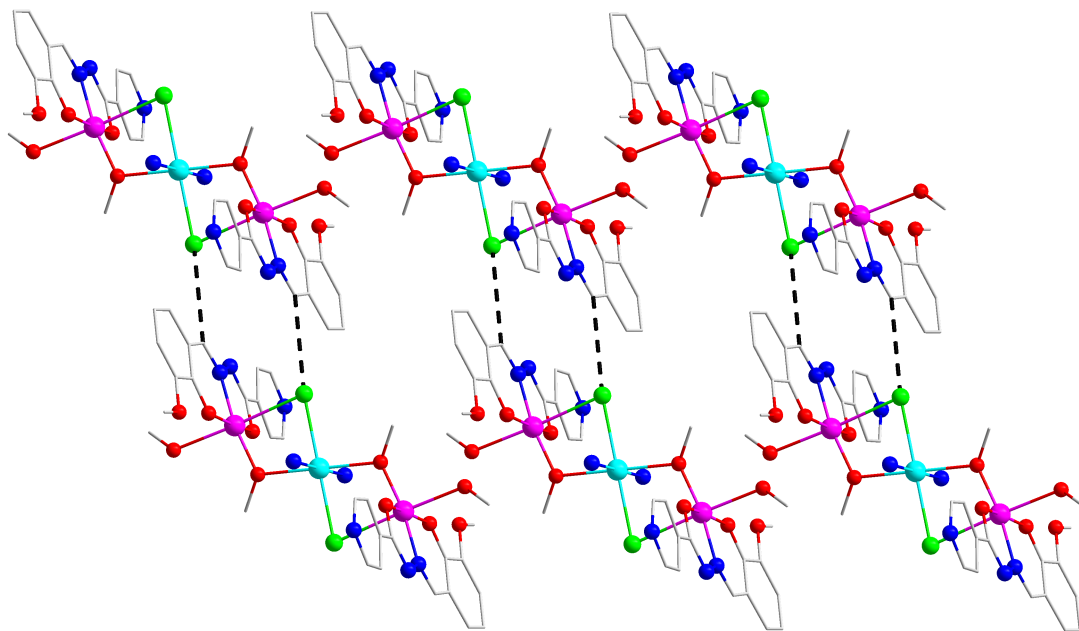

**Fig. S4** The packing arrangement of **3** viewed along the *b* axis. The hydrogen atoms and solvent molecules are omitted for clarity. The black dotted lines represent the hydrogen bonds between the polymeric chains. Color code: Turquoise (Mn<sup>II</sup>), Purple (Mn<sup>III</sup>), Red (O), Blue (N), Gray (C), Green (Cl).

5

10

15

20

25

5

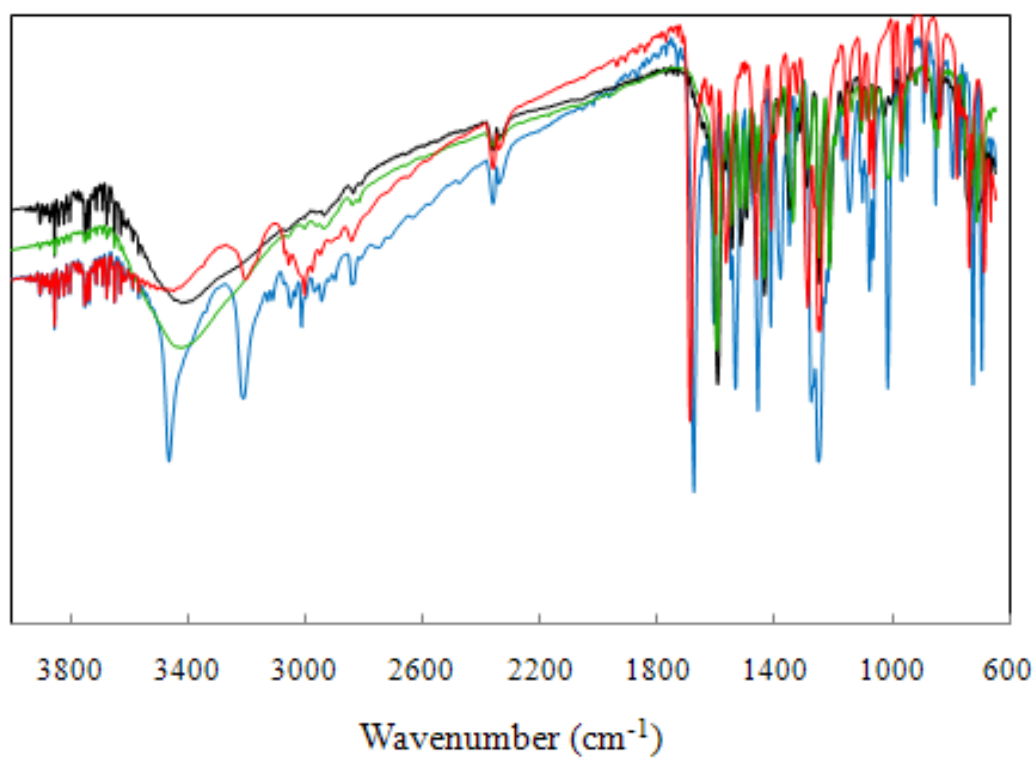

Fig. S5 Infrared spectra of H<sub>2</sub>hmi(red), complex 1(blue), complex 2(black) and complex 3(green) from 4000 to 600 cm<sup>-1</sup>.

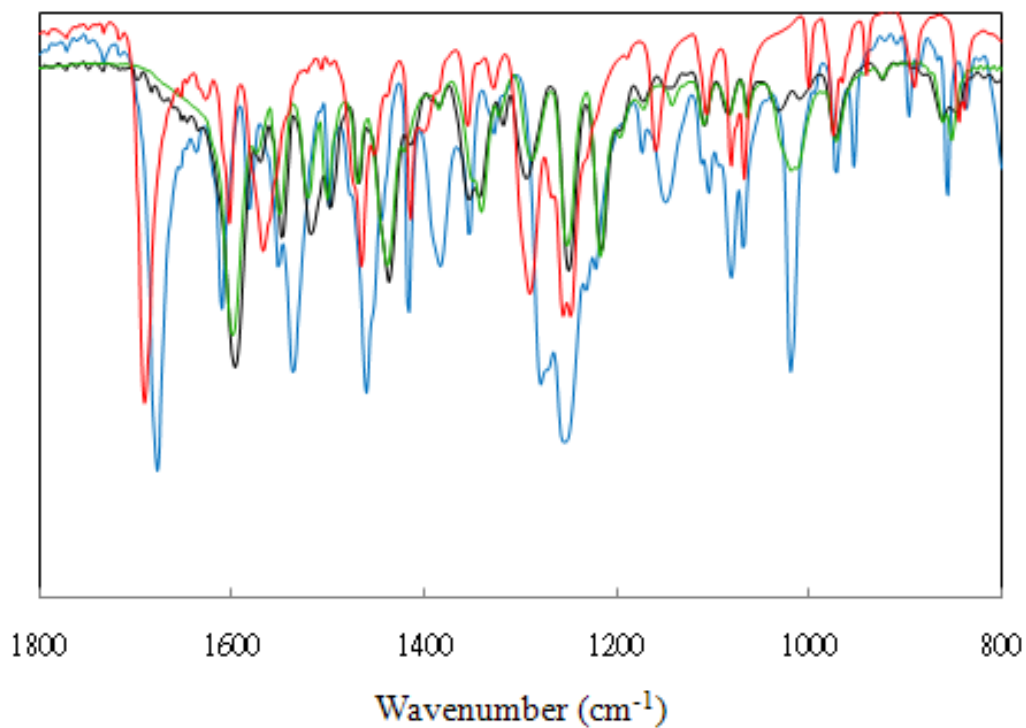

Fig. S6 Infrared spectra of H<sub>2</sub>hmi (red), complex 1 (blue), complex 2 (black) and complex 3 (green) from 1800-800 cm<sup>-1</sup>.

5

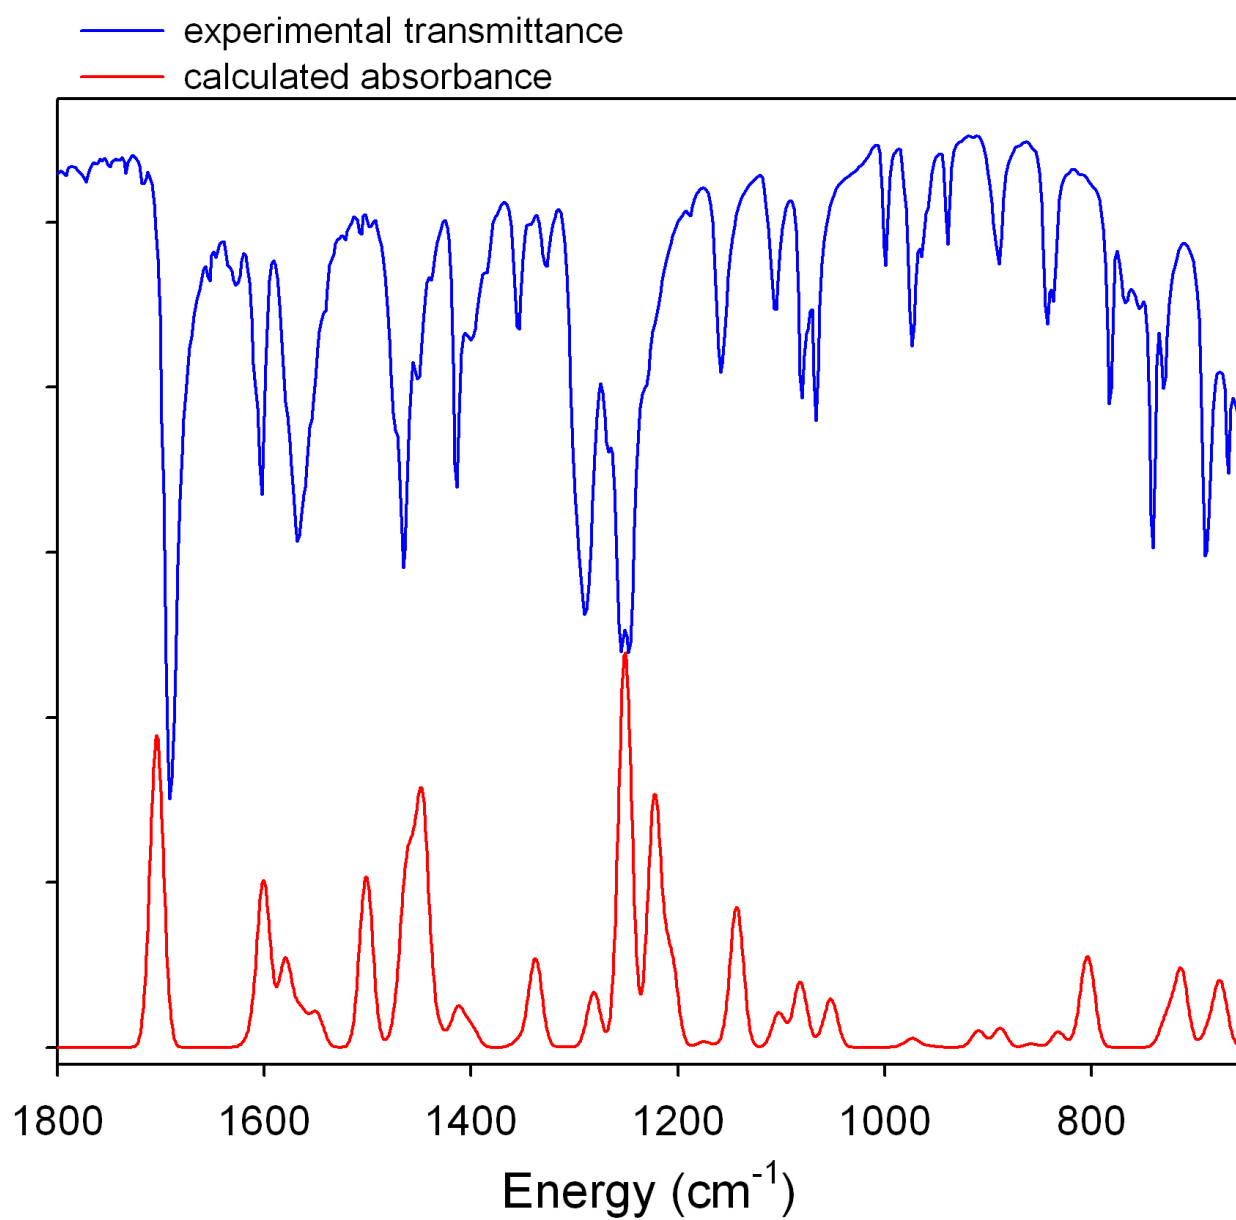

Fig. S7 The IR comparison of DFT caculated absorbance (red) and eperimental transmittance (blue) of H<sub>2</sub>hmi

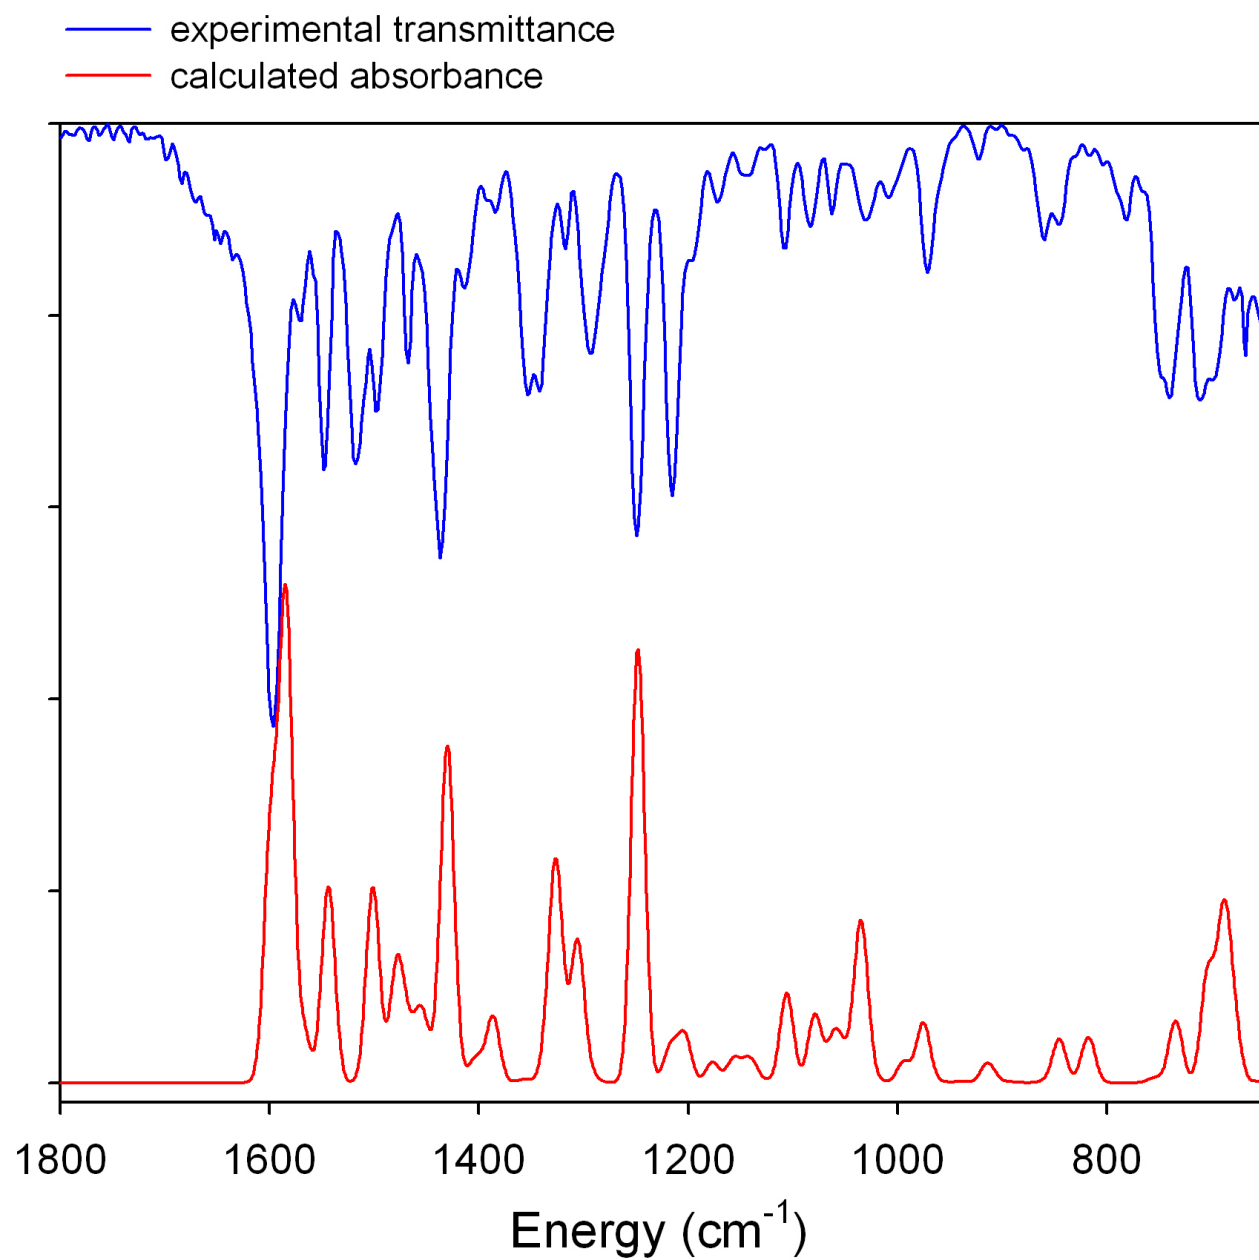

5 **Fig. S8** The IR comparison of DFT caculated absorbance (red) and experimental transmittance (blue) of complex **2**
